# Supplementary material for: ASXL1 and SETBP1 mutations promote leukaemogenesis by repressing TGFβ pathway genes through histone deacetylation
Source: PubMed Central journal article supplement (PMC6203835; doi:10.1038/s41598-018-33881-2), 2018-10-26

## **Supplemental Information**

### **ASXL1 and SETBP1 mutations promote leukaemogenesis by repressing TGF $\beta$ pathway genes through histone deacetylation**

**Makoto Saika<sup>1</sup>, Daichi Inoue<sup>1,2</sup>, Reina Nagase<sup>1</sup>, Naru Sato<sup>1</sup>, Akiho Tsuchiya<sup>1</sup>,  
Tomohiro Yabushita<sup>1</sup>, Toshio Kitamura<sup>1\*</sup>, Susumu Goyama<sup>1\*</sup>**

<sup>1</sup>Division of Cellular Therapy, The Institute of Medical Science, The University of Tokyo, 4-6-1 Shirokanedai, Minato-ku, Tokyo 108-8639, Japan

<sup>2</sup>(current address) Human Oncology and Pathogenesis Program, Department of Medicine, Memorial Sloan Kettering Cancer Center, New York, NY, USA.

Supplemental Figure 1

Supplemental Figure 2

Supplemental Figure 3

## Supplemental Figure 1

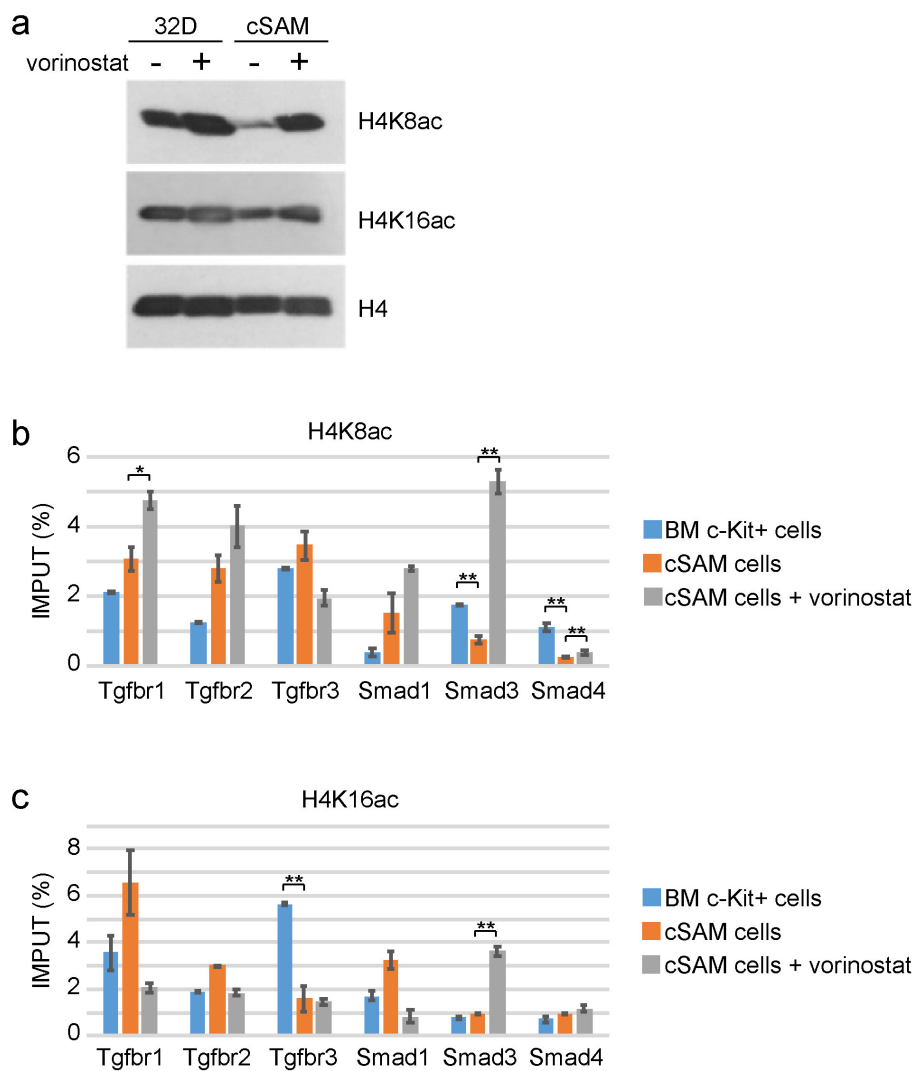

### Supplemental Figure 1.

(a) Western blotting for histone acetylation in 32D cells and cSAM cells. Vorinostat increased H3K8ac and H4K16ac in cSAM cells. Full-length blots are shown in Supplemental Figure 2.

(b, c) Genomic DNA fragments from bone marrow c-kit+ cells and cSAM cells cultured with 1  $\mu$ M vorinostat or vehicle control (DMSO) were immunoprecipitated with anti-H4K8ac (b) and anti-H4K16ac (c) antibodies. Enrichments of H3K14ac and H4K16ac at transcription starting sites of Tgfr1, Tgfr2, Tgfr3, Smad1, Smad3, and Smad4 were measured by qPCR. Data are shown as mean  $\pm$  s.e.m.

\* $P < 0.05$ , \*\* $P < 0.01$ , Student t-test.

## Supplemental Figure 2

### Full blots for Figure 2b & Supplemental Figure 1

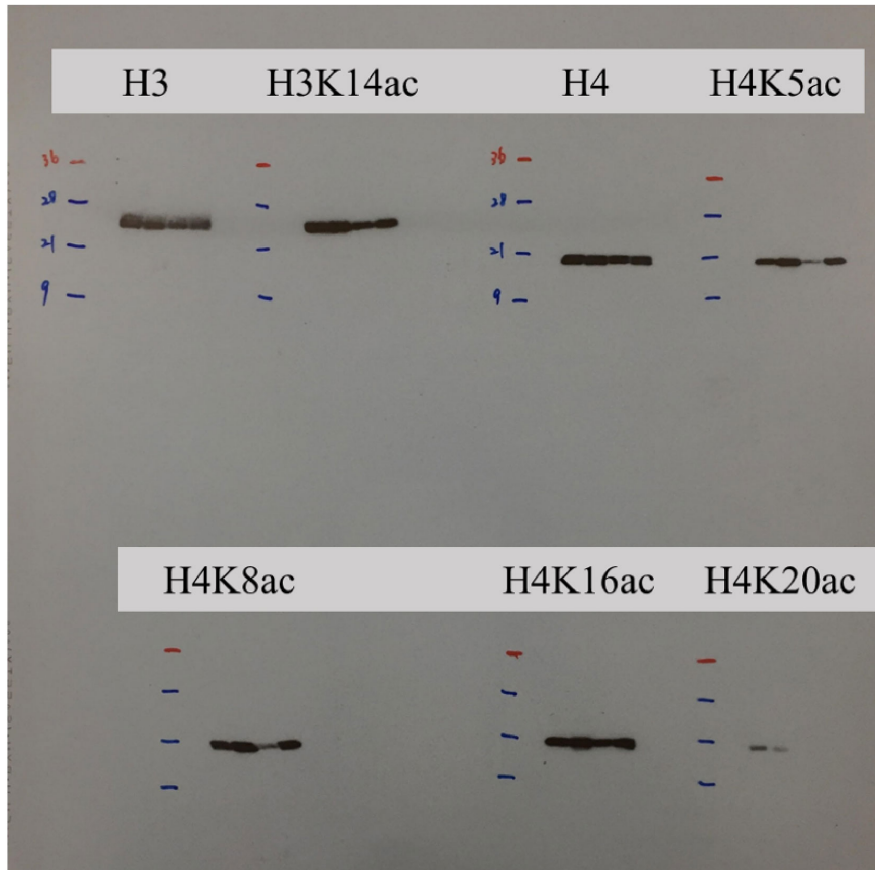

### Full blots for Figure 3c

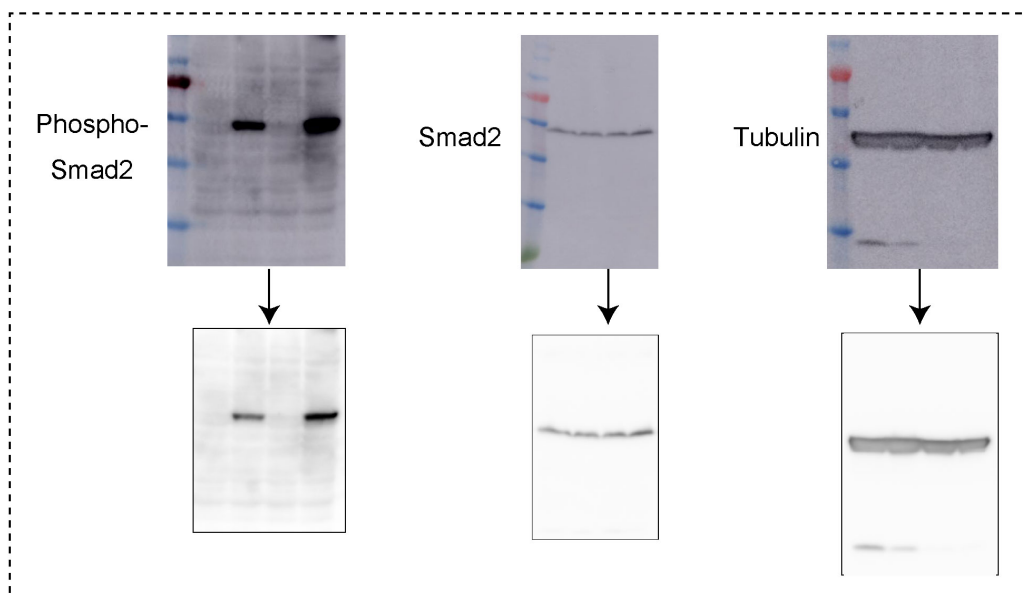

## Supplemental Figure 3

### Full blots for Figure 6a

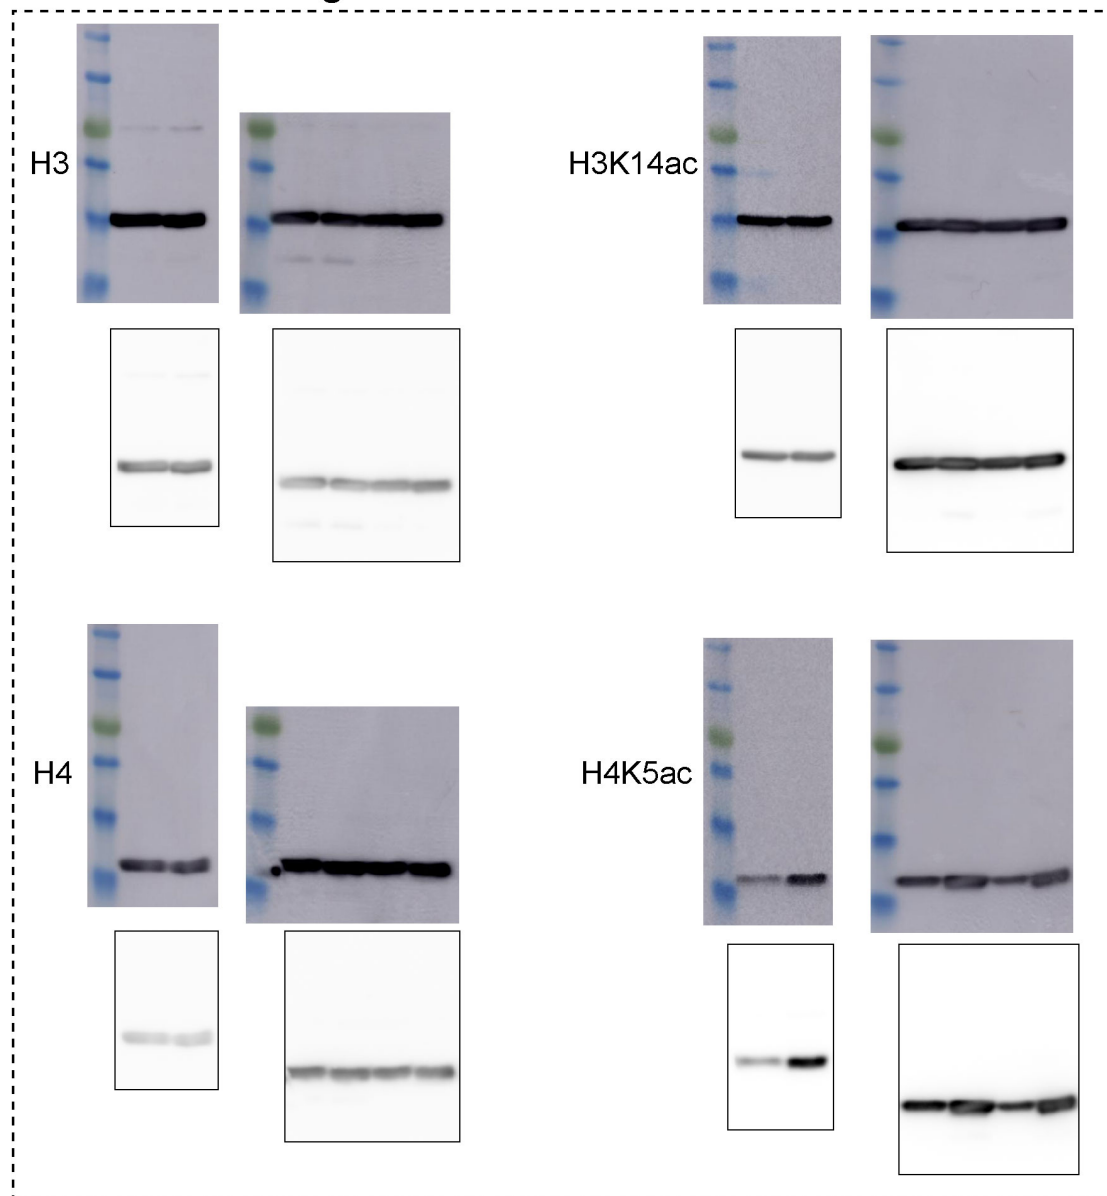

Supplement: 41598_2018_33881_MOESM1_ESM.pdf [file 41598_2018_33881_MOESM1_ESM.pdf]
